# Supplementary material for: A reinforced concrete structure rGO/CNTs/Fe2O3/PEDOT:PSS paper electrode with excellent wettability and flexibility for supercapacitors
Source: Royal Society of Chemistry journal article supplement (doi:10.1039/d1nj02790e), 2021-01-01
Supplement: d1nj02790e2.pdf [file d1nj02790e2.pdf]

## Supporting information

### **Reinforced Concrete Structure rGO/CNTs/Fe<sub>2</sub>O<sub>3</sub>/PEDOT:PSS Paper Electrode with excellent wettability and flexibility for Supercapacitors**

Jia Song<sup>a,b</sup>, Yan Sui<sup>a,b</sup>, Qi zhao<sup>a</sup>, Yuncheng Ye<sup>a</sup>, Chuanli Qin<sup>\*a</sup>, Xiaoshuang Chen<sup>c</sup>,  
Kun Song<sup>c</sup>

<sup>a</sup>. School of Chemistry and Materials Science, Heilongjiang University, Harbin 150080, China

<sup>b</sup>. Key Laboratory of Chemical Engineering Process & Technology for High-efficiency Conversion, College of Heilongjiang Province, Harbin 150080, People's Republic of China

<sup>c</sup>. College of Chemistry and Chemical Engineering, Qiqihar University, Qiqihar, 161006, Heilongjiang, P. R. China

## Experimental Procedures

### Materials and Characterization

Ferric nitrate, methanol and ammonium hydroxide are purchased from Aladdin. Ethanol, vitriol, rGO are purchased from Tianjin recovery technology development Co., Ltd. (Tianjin, China). Poly(3,4-ethylenedioxythiophene) -poly(styrenesulfonate) (PEDOT: PSS) is purchased from Gold leaf electronics Co., Ltd. (Shenzhen, China). All chemicals used in this study are analytical grade. Powder XRD patterns are obtained on a Bruker D8 Focus (Germany) diffractometer using Cu K $\alpha$  radiation ( $\lambda = 0.15418$  nm). Sample morphologies are observed by SEM using a Rigaku S-4300 (Rigaku, Tokyo, Japan) spectrometer with an energy dispersive spectrometer (EDS). The microscopic features of the samples are observed by TEM using a Rigaku H-7650 electron microscope at 100 kV. HRTEM images are obtained using a Tecnai G2 transmission electron microscope (USA) operated at an accelerating voltage of 200 kV. X-ray photoelectron spectroscopy (XPS) measurements are recorded on an RBD upgraded PHI-5000C ESCA system (PerkinElmer) with Al K $\alpha$  radiation ( $h\nu = 1486$  eV).

### Electrochemical Measurement

The rGO/CNTs/Fe<sub>2</sub>O<sub>3</sub>/PEDOT:PSS composite paper is tailored and applied to working electrodes (1 cm  $\times$  1.5 cm, effective worked area of 1 cm  $\times$  1 cm). A platinum foil (10 mm  $\times$  10 mm) is employed as the counter electrode and SCE (saturated calomel electrode) as reference electrode, which apply to a three-electrode system in 3 M KOH solution. The CHI 660D electrochemistry workstation is used to the electrochemical measurements. Cyclic voltammetry (CV) tests are conducted in a potential range of -1–1 V (versus SCE) at scan rates of 10-100 mV  $\cdot$  s<sup>-1</sup>. The cycling behavior is particularly pronounced to 10000 cycles, and galvanostatic charge-discharge (GCD) tests are carried out at various current densities with a potential range of 0–2 V (versus SCE). EIS (Electrochemical impedance spectroscopy) is implemented to testify the capacitive property at OCV (open circuit voltage) with a frequency from 1 to 10<sup>5</sup> Hz.

The symmetric supercapacitors are assembled with rGO/CNTs/Fe<sub>2</sub>O<sub>3</sub>/PEDOT: PSS composite paper as positive electrode and negative electrode. The two electrodes of the symmetric flexible supercapacitor are separated by a separator (NKK, MPF30AC-100), and 3 M KOH is used as the electrolyte. The Formula for calculating the mass specific capacitance of a single electrode is  $C_m = I \cdot \Delta t / m \cdot \Delta V$  (F1) and the area specific capacitance of a single electrode is  $C_s = I \cdot \Delta t / s \cdot \Delta V$  (F2). The area ratio of two electrodes is decided in accordance with the charge balance equation ( $q_+ = q_-$ ). To achieve this, the area of the electrode materials is balanced in accordance with the equation:  $C_s = I \cdot \Delta t / 2s \cdot \Delta V$  (F3) and the volume specific capacitance of a cell is  $C_v = I \cdot \Delta t / v \cdot \Delta V$  (F4), this  $C_s$  is the area specific capacitance,  $C_v$  is the volume specific capacitance,  $I$  is current density,  $\Delta t$  is discharge time,  $s$  is area of electrode materials,  $v$  is volume of a cell and  $\Delta V$  is the voltage range of positive - negative voltage, respectively. The specific energy density  $E$  and power density  $P$  are defined as  $E = 1/2$

$C_m(\Delta V)^2(F5)$  and  $P = E/\Delta t(F6)$ .

## Results and Discussion

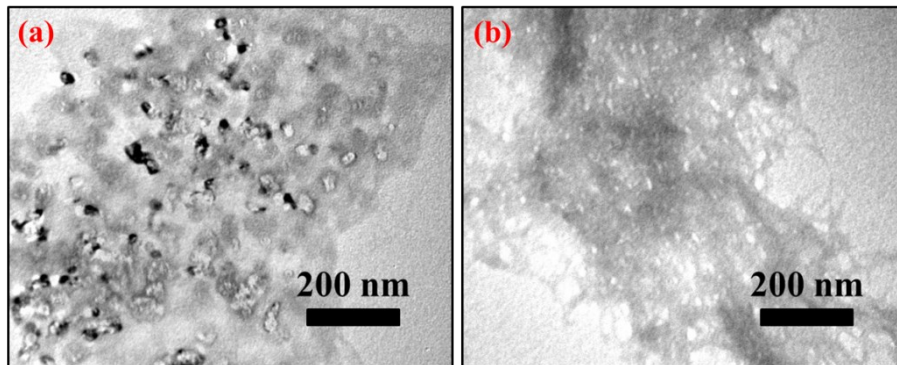

Figure S1. TEM images of (a) PEDOT:PSS solution, (b) PEDOT:PSS film.

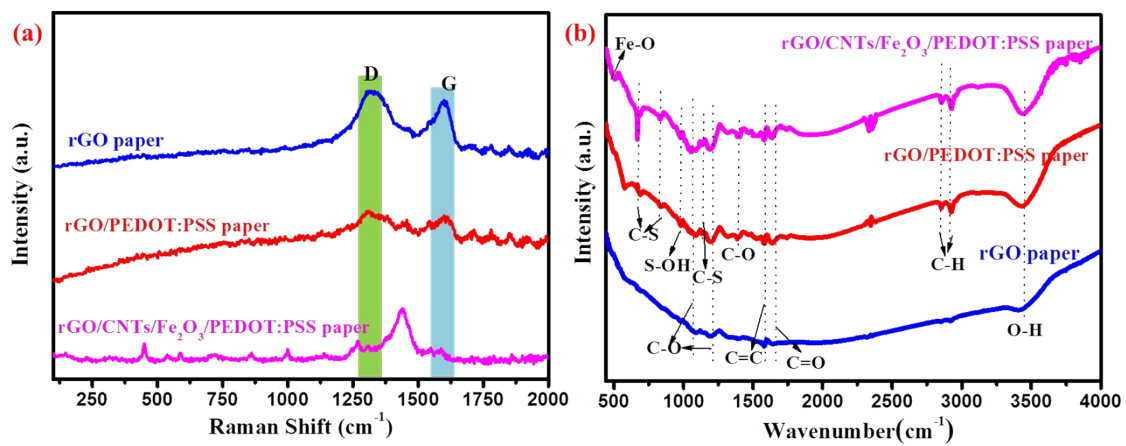

Figure S2. (a) Raman spectra and (b) FTIR spectra of rGO paper, rGO/PEDOT:PSS paper and rGO/CNTs/Fe<sub>2</sub>O<sub>3</sub>/PEDOT:PSS composite paper.

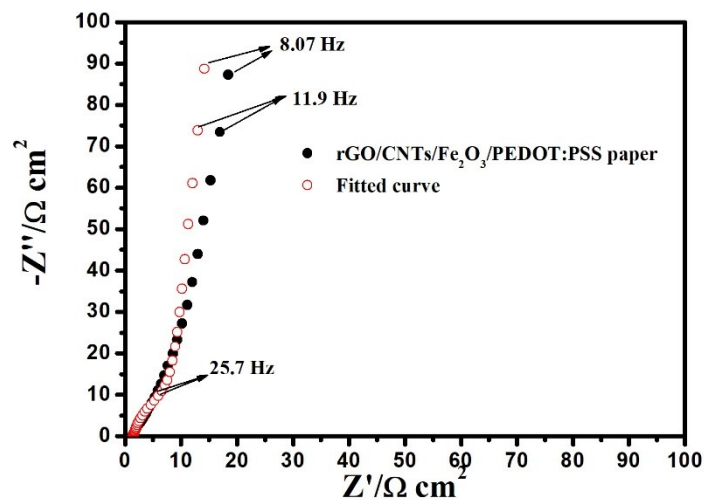

Figure S3. Impedance curve and fitting curve of rGO/CNTs/Fe<sub>2</sub>O<sub>3</sub>/PEDOT:PSS composite paper

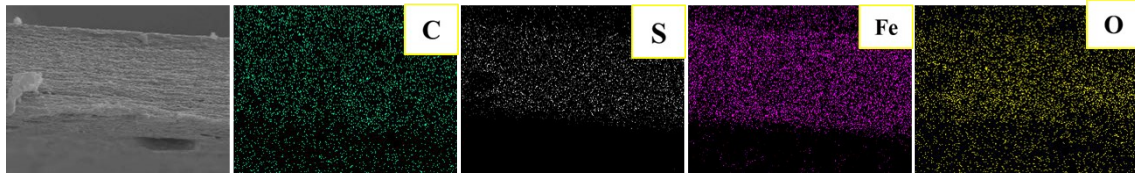

Figure S4. The cross section SEM and the corresponding elemental mapping images of rGO/CNTs/Fe<sub>2</sub>O<sub>3</sub>/PEDOT:PSS paper.

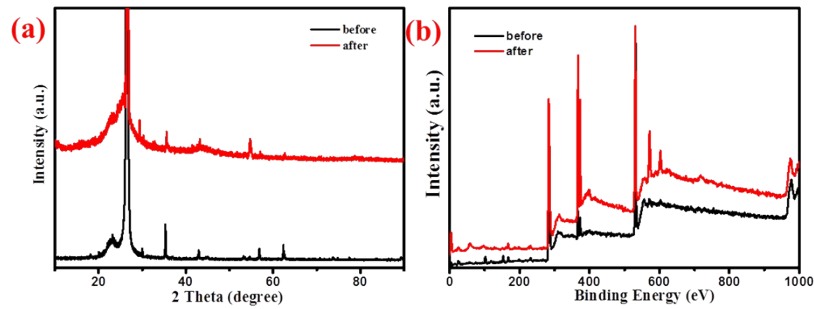

Figure S5. (a, b) XPS and XRD patterns of rGO/CNTs/Fe<sub>2</sub>O<sub>3</sub>/PEDOT:PSS paper before and after 10000 cycles.

**Table1.** Comparisons of specific capacitance, energy density and power density of PEDOT:PSS and rGO based supercapacitors.

| Material                                           | Specific capacitance                             | Energy Density            | Power Density            | Voltag   | Ref.      |
|----------------------------------------------------|--------------------------------------------------|---------------------------|--------------------------|----------|-----------|
|                                                    |                                                  |                           |                          | <b>e</b> |           |
| Co <sub>9</sub> S <sub>8</sub> /PEDOT:PSS/rGO      | 788.9 F g <sup>-1</sup> at 1 A g <sup>-1</sup>   | 19.6 Wh kg <sup>-1</sup>  | 400.9 W kg <sup>-1</sup> | 1.6 V    | 20        |
| Ti <sub>3</sub> C <sub>2</sub> T <sub>x</sub> /rGO | 313 F g <sup>-1</sup> at 1 A g <sup>-1</sup>     | 7.5 Wh kg <sup>-1</sup>   | 500 W kg <sup>-1</sup>   | 1.0 V    | 35        |
| VO <sub>2</sub> (B)/CNT/rGO                        | 649.1 F g <sup>-1</sup> at 0.5 A g <sup>-1</sup> | 32.5 Wh kg <sup>-1</sup>  | 3000 W kg <sup>-1</sup>  | 1.2 V    | 47        |
| PEDOT:PSS@CoFe <sub>2</sub> O <sub>4</sub>         | 181.3 F g <sup>-1</sup> at 1 A g <sup>-1</sup>   | 25.17 Wh kg <sup>-1</sup> | 620.6 W kg <sup>-1</sup> | 2.0 V    | 48        |
| CNTs/PEDOT                                         | 147 F g <sup>-1</sup> at 0.5 A g <sup>-1</sup>   | 12.6 Wh kg <sup>-1</sup>  | 10200 W kg <sup>-1</sup> | 1.4 V    | 49        |
| rGO/PEDOT/PANI                                     | 535 F g <sup>-1</sup> at 1 A g <sup>-1</sup>     | 26.89 Wh kg <sup>-1</sup> | 800 W kg <sup>-1</sup>   | 0.8 V    | 50        |
| GP@NiO                                             | 306.9 F g <sup>-1</sup> at 0.5 A g <sup>-1</sup> | 17.6 Wh kg <sup>-1</sup>  | 0.25 kW kg <sup>-1</sup> | 1.0 V    | 51        |
| rGO/Fe <sub>2</sub> O <sub>3</sub> /CNTs/PEDOT:PSS | 997 F g <sup>-1</sup> at 1 A g <sup>-1</sup>     | 35.6 Wh kg <sup>-1</sup>  | 166 W kg <sup>-1</sup>   | 1.6 V    | This work |
